# Supplementary material for: Divalent copper trans-1,4-cyclohexanedicarboxylate coordination polymers with isomeric dipyridylamide ligands: new pillared and self-penetrated binodal networks
Source: Royal Society of Chemistry journal article supplement (doi:10.1039/c3ce40889b), 2013-01-01
Supplement: c3ce40889b.pdf [file c3ce40889b.pdf]

## Supporting Information

Divalent Copper *trans*-1,4-Cyclohexanedicarboxylate Coordination Polymers with  
Isomeric Dipyridylamide Ligands: New Pillared and Self-Penetrated Binodal Networks

Sultan H. Qiblawi, Amy L. Pochodylo and Robert L. LaDuca\*

Fig. S1. Curie-Weiss Plot for **1**.

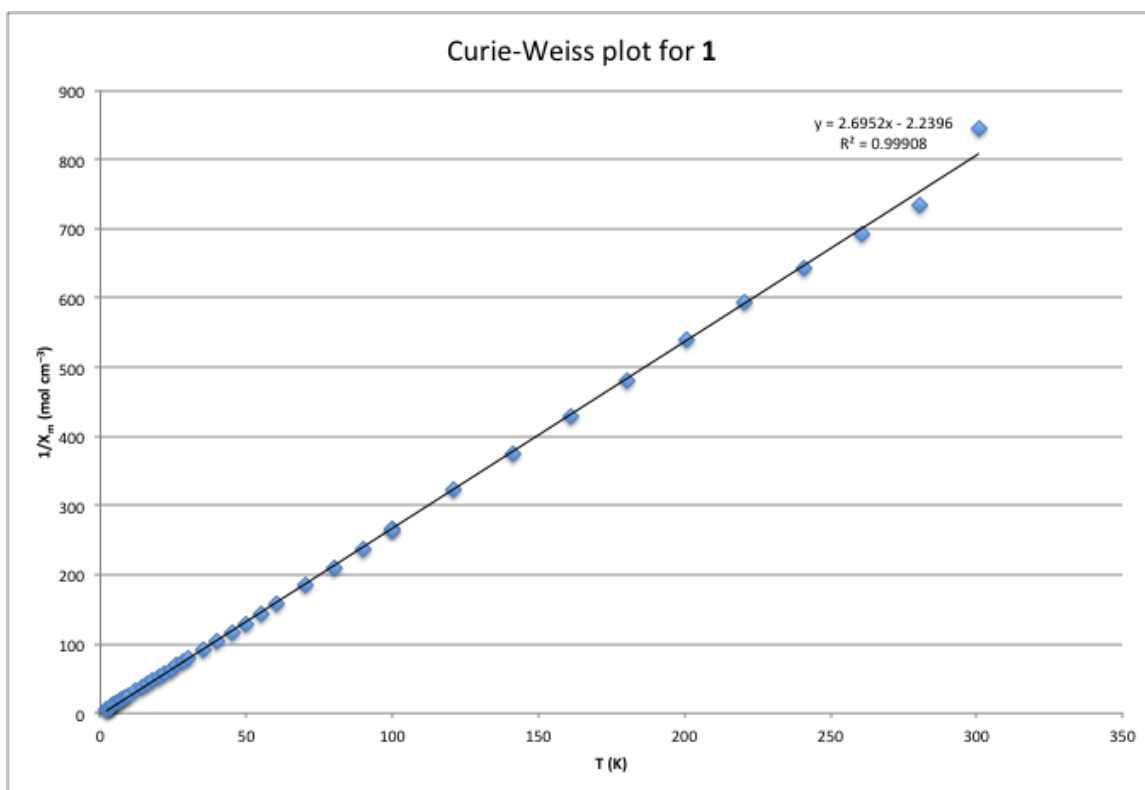

Fig. S2. Curie-Weiss Plot for **2**.

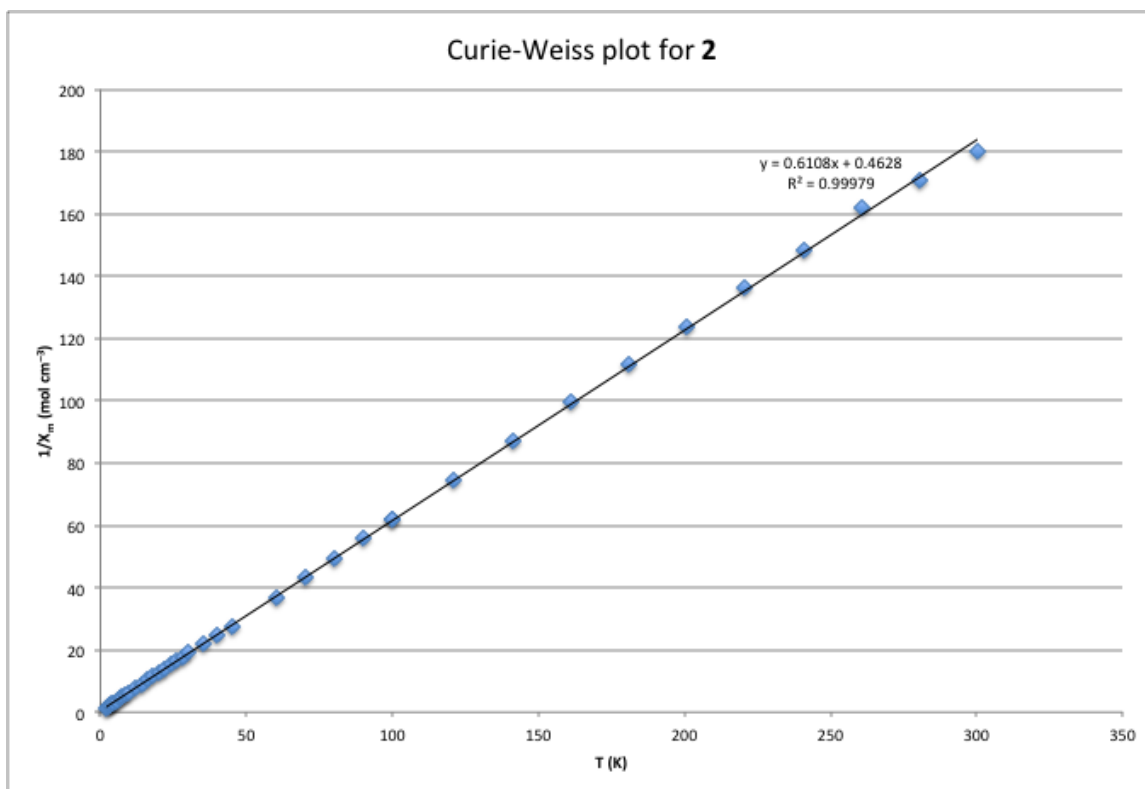

Fig. S3. Thermogravimetric analysis plot for **1**.

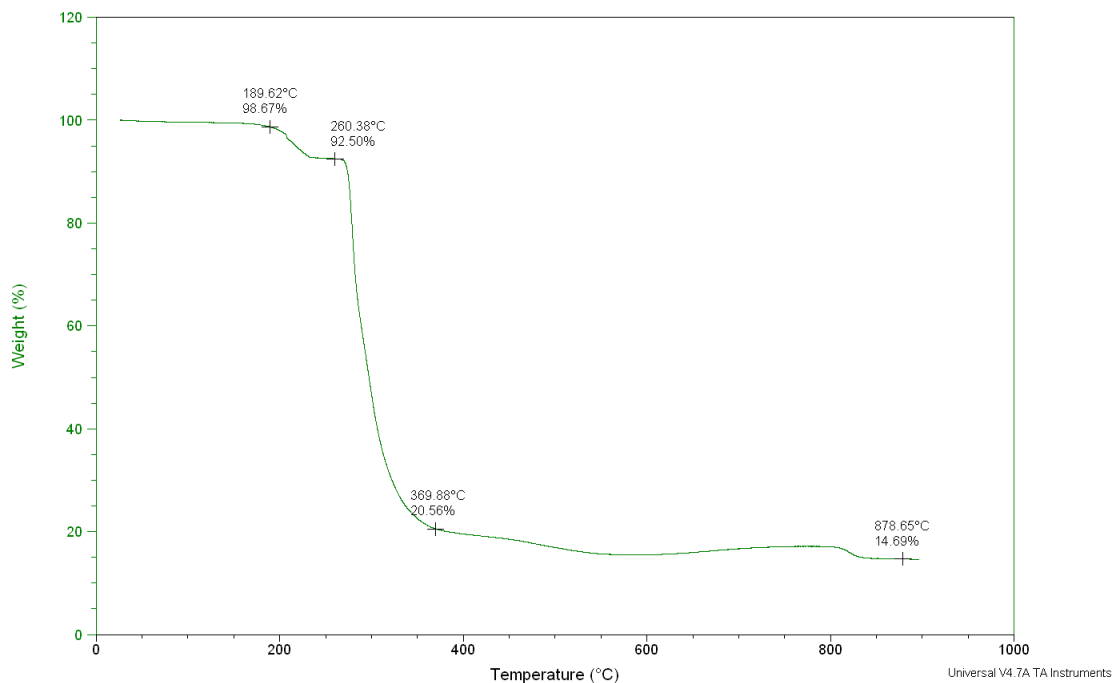

Fig. S4. Thermogravimetric analysis plot for **2**.

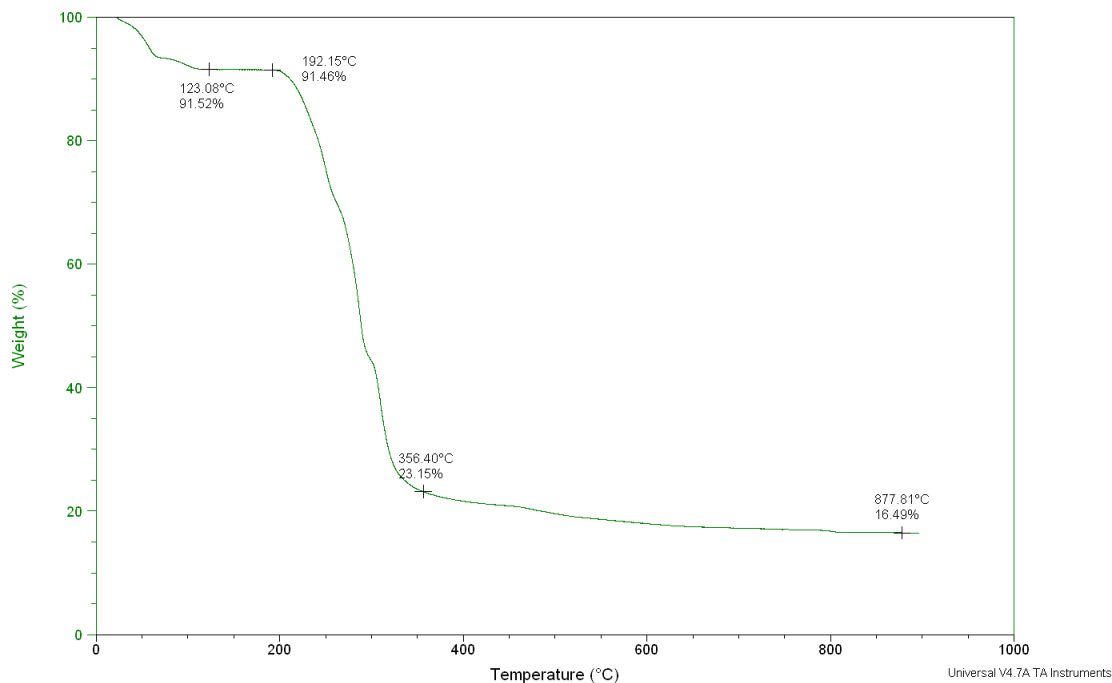

## Topological Analysis output for 1.

#####  
229:Cu 14cyclohedcarb 3pna  
#####

### Topology for Cu1

-----  
Atom Cu1 links by bridge ligands and has  
Common vertex with R(A-A)

|      |         |        |         |           |         |   |
|------|---------|--------|---------|-----------|---------|---|
| Ag 1 | 0.2852  | 0.9859 | 0.0552  | (0 0 0)   | 5.125A  | 1 |
| Ag 1 | 0.2148  | 0.4859 | 0.4448  | (0 0 0)   | 5.350A  | 1 |
| Ag 1 | 0.2148  | 0.5141 | -0.0552 | (0 1 -1)  | 5.389A  | 1 |
| Cu 1 | 0.7247  | 0.8897 | 0.7015  | (0 1 0)   | 11.720A | 1 |
| Cu 1 | -0.2753 | 0.8897 | -0.2985 | (-1 1 -1) | 11.720A | 1 |

### Topology for Ag1

-----  
Atom Ag1 links by bridge ligands and has  
Common vertex with R(A-A)

|      |        |        |        |          |        |   |
|------|--------|--------|--------|----------|--------|---|
| Cu 1 | 0.2753 | 0.1103 | 0.2985 | (0 -1 0) | 5.125A | 1 |
| Cu 1 | 0.2247 | 0.6103 | 0.2015 | (0 0 0)  | 5.350A | 1 |
| Cu 1 | 0.2247 | 0.3897 | 0.7015 | (0 1 0)  | 5.389A | 1 |

### Structural group analysis

#### Structural group No 1

-----  
Structure consists of 3D framework with AgCu

### Coordination sequences

-----  
Cu1: 1 2 3 4 5 6 7 8 9 10  
Num 5 13 30 55 83 122 169 217 278 347  
Cum 6 19 49 104 187 309 478 695 973 1320  
Rad 7.9(3.5) 12.5(5.6) 17.0(7.1) 21.4(8.9) 26.7(10.7) 31.9(12.4) 36.9(14.3) 42.3(16.3) 47.6(18.1)  
52.8(20.1)  
Cmp Cu2Ag3 Cu7Ag6 Cu16Ag14 Cu27Ag28 Cu42Ag41 Cu62Ag60 Cu84Ag85 Cu109Ag108  
Cu140Ag138 Cu173Ag174  
-----  
Ag1: 1 2 3 4 5 6 7 8 9 10  
Num 3 11 26 51 83 118 165 217 274 343  
Cum 4 15 41 92 175 293 458 675 949 1292  
Rad 5.3(0.1) 11.1(2.8) 15.3(5.6) 20.2(7.8) 25.3(9.5) 30.8(11.4) 36.0(13.4) 41.4(15.3) 46.9(17.3) 52.1(19.3)  
Cmp Cu3 Cu6Ag5 Cu14Ag12 Cu28Ag23 Cu41Ag42 Cu60Ag58 Cu85Ag80 Cu108Ag109 Cu138Ag136  
Cu174Ag169

-----  
TD10=1306

### Vertex symbols for selected sublattice

-----  
Cu1 Point (Schlafli) symbol: {4.6^6.8^3}  
Extended point symbol:[4.6.6.6(2).6(2).6(3).6(3).8(3).8(3).8(8)]  
-----

Ag1 Point (Schlafli) symbol: {4.6.8}

Extended point symbol:[4.6(2).8(9)]

Point (Schlafli) symbol for net: {4.6.8}{4.6^6.8^3}

3,5-c net with stoichiometry (3-c)(5-c); 2-nodal net

New topology, please, contact the authors (23682 types in 6 databases)

Minimum circuits for independent edges (bonds)

| No | Atom | x      | y      | z      | Atom | x      | y      | z       | Dist.  | N |
|----|------|--------|--------|--------|------|--------|--------|---------|--------|---|
| 1  | Cu1  | 0.2247 | 0.6103 | 0.2015 | Ag1  | 0.2852 | 0.9859 | 0.0552  | 5.125  | 4 |
| 2  | Cu1  | 0.2247 | 0.6103 | 0.2015 | Ag1  | 0.2148 | 0.4859 | 0.4448  | 5.350  | 6 |
| 3  | Cu1  | 0.2247 | 0.6103 | 0.2015 | Ag1  | 0.2148 | 0.5141 | -0.0552 | 5.389  | 4 |
| 4  | Cu1  | 1.2247 | 0.6103 | 1.2015 | Cu1  | 0.7247 | 0.8897 | 0.7015  | 11.720 | 6 |

Non-equivalent circuits

Circuit No 1; Type=4; Centroid: (0.250,0.750,0.000)

| Atom | x      | y      | z       |
|------|--------|--------|---------|
| Cu1  | 0.2247 | 0.6103 | 0.2015  |
| Ag1  | 0.2148 | 0.5141 | -0.0552 |
| Cu1  | 0.2753 | 0.8897 | -0.2015 |
| Ag1  | 0.2852 | 0.9859 | 0.0552  |

Circuit No 2; Type=6a; Centroid: (0.500,0.000,0.500)

| Atom | x      | y       | z      |
|------|--------|---------|--------|
| Cu1  | 0.2247 | -0.3897 | 0.2015 |
| Ag1  | 0.2852 | -0.0141 | 0.0552 |
| Cu1  | 0.2753 | 0.1103  | 0.2985 |
| Cu1  | 0.7753 | 0.3897  | 0.7985 |
| Ag1  | 0.7148 | 0.0141  | 0.9448 |
| Cu1  | 0.7247 | -0.1103 | 0.7015 |

Circuit No 3; Type=6b; Centroid: (0.500,0.829,0.250)

| Atom | x      | y      | z       |
|------|--------|--------|---------|
| Cu1  | 0.2247 | 0.6103 | 0.2015  |
| Ag1  | 0.2852 | 0.9859 | 0.0552  |
| Cu1  | 0.2753 | 0.8897 | -0.2015 |
| Cu1  | 0.7753 | 0.6103 | 0.2985  |
| Ag1  | 0.7148 | 0.9859 | 0.4448  |
| Cu1  | 0.7247 | 0.8897 | 0.7015  |

Circuit No 4; Type=6c; Centroid: (0.512,0.750,0.268)

| Atom | x | y | z |
|------|---|---|---|
|------|---|---|---|

-----  
Cu1 0.2247 0.6103 0.2015  
Ag1 0.2852 0.9859 0.0552  
Cu1 0.2753 0.8897 -0.2015  
Cu1 0.7753 0.6103 0.2985  
Ag1 0.7852 0.5141 0.5552  
Cu1 0.7247 0.8897 0.7015

Circuit No 5; Type=6d; Centroid: (0.000,0.000,0.000)

-----  
Atom x y z  
-----  
Cu1 0.2247 -0.3897 0.2015  
Ag1 0.2852 -0.0141 0.0552  
Cu1 0.2753 0.1103 0.2985  
Cu1 -0.2247 0.3897 -0.2015  
Ag1 -0.2852 0.0141 -0.0552  
Cu1 -0.2753 -0.1103 -0.2985

Circuit No 6; Type=6e; Centroid: (0.000,0.829,0.750)

-----  
Atom x y z  
-----  
Cu1 0.2247 0.6103 1.2015  
Ag1 0.2852 0.9859 1.0552  
Cu1 0.2753 0.8897 0.7985  
Cu1 -0.2247 0.6103 0.2985  
Ag1 -0.2852 0.9859 0.4448  
Cu1 -0.2753 0.8897 0.7015

Circuit No 7; Type=8a; Centroid: (0.250,0.750,0.500)

-----  
Atom x y z  
-----  
Cu1 0.2247 0.6103 0.2015  
Ag1 0.2148 0.4859 0.4448  
Cu1 0.2247 0.3897 0.7015  
Ag1 0.2148 0.5141 0.9448  
Cu1 0.2753 0.8897 0.7985  
Ag1 0.2852 1.0141 0.5552  
Cu1 0.2753 1.1103 0.2985  
Ag1 0.2852 0.9859 0.0552

Circuit No 8; Type=8b; Centroid: (0.451,0.575,0.306)

-----  
Atom x y z  
-----  
Cu1 0.2247 0.6103 0.2015  
Ag1 0.2148 0.4859 0.4448  
Cu1 0.2753 0.1103 0.2985  
Cu1 0.7753 0.3897 0.7985  
Ag1 0.7852 0.5141 0.5552  
Cu1 0.7753 0.6103 0.2985  
Cu1 0.2753 0.8897 -0.2015  
Ag1 0.2852 0.9859 0.0552

| Atom | x       | y      | z      |
|------|---------|--------|--------|
| Cu1  | 0.2247  | 0.6103 | 1.2015 |
| Ag1  | 0.2148  | 0.4859 | 1.4448 |
| Cu1  | 0.2753  | 0.1103 | 1.2985 |
| Cu1  | -0.2247 | 0.3897 | 0.7985 |
| Ag1  | -0.2148 | 0.5141 | 0.5552 |
| Cu1  | -0.2247 | 0.6103 | 0.2985 |
| Cu1  | 0.2753  | 0.8897 | 0.7985 |
| Ag1  | 0.2852  | 0.9859 | 1.0552 |

Circuit No 10; Type=8d; Centroid: (0.443,0.516,0.293)

| Atom | x      | y      | z       |
|------|--------|--------|---------|
| Cu1  | 0.2247 | 0.6103 | 0.2015  |
| Ag1  | 0.2148 | 0.5141 | -0.0552 |
| Cu1  | 0.2753 | 0.8897 | -0.2015 |
| Cu1  | 0.7753 | 0.6103 | 0.2985  |
| Ag1  | 0.7852 | 0.5141 | 0.5552  |
| Cu1  | 0.7753 | 0.3897 | 0.7985  |
| Cu1  | 0.2753 | 0.1103 | 0.2985  |
| Ag1  | 0.2148 | 0.4859 | 0.4448  |

Circuit No 11; Type=8e; Centroid: (0.068,0.516,0.918)

| Atom | x       | y      | z      |
|------|---------|--------|--------|
| Cu1  | 0.2247  | 0.6103 | 1.2015 |
| Ag1  | 0.2148  | 0.5141 | 0.9448 |
| Cu1  | 0.2753  | 0.8897 | 0.7985 |
| Cu1  | -0.2247 | 0.6103 | 0.2985 |
| Ag1  | -0.2148 | 0.5141 | 0.5552 |
| Cu1  | -0.2247 | 0.3897 | 0.7985 |
| Cu1  | 0.2753  | 0.1103 | 1.2985 |
| Ag1  | 0.2148  | 0.4859 | 1.4448 |

Circuit No 12; Type=8f; Centroid: (0.259,0.538,0.201)

| Atom | x       | y      | z       |
|------|---------|--------|---------|
| Cu1  | 0.2247  | 0.6103 | 0.2015  |
| Cu1  | -0.2753 | 0.8897 | -0.2985 |
| Ag1  | -0.2148 | 0.5141 | -0.4448 |
| Cu1  | -0.2247 | 0.3897 | -0.2015 |
| Cu1  | 0.2753  | 0.1103 | 0.2985  |
| Cu1  | 0.7753  | 0.3897 | 0.7985  |
| Ag1  | 0.7852  | 0.5141 | 0.5552  |
| Cu1  | 0.7247  | 0.8897 | 0.7015  |

Circuit No 13; Type=8g; Centroid: (0.222,0.004,0.450)

| Atom | x | y | z |
|------|---|---|---|
|------|---|---|---|



Cu1 0.2247 -0.3897 0.2015  
Cu1 -0.2753 -0.1103 -0.2985  
Ag1 -0.2852 0.0141 -0.0552  
Cu1 -0.2753 0.1103 0.2015  
Cu1 0.2247 0.3897 0.7015  
Cu1 0.7247 0.1103 1.2015  
Ag1 0.7148 0.0141 0.9448  
Cu1 0.7247 -0.1103 0.7015  
Crossed with bonds

```
-----  
No | Atom   x   y   z | Atom   x   y   z | Dist. | N Cycles  
-----  
* 3 | Cu1    0.2753 0.1103 0.2985 | Ag1    0.2852 0.0141 0.5552 | 5.389 | 8g/1 8g/1  
-----
```

Circuit No 14; Type=8h; Centroid: (0.241,0.809,0.986)

```
-----  
Atom   x   y   z  
-----  
Cu1    0.2247 0.6103 1.2015  
Cu1    -0.2753 0.8897 0.7015  
Ag1    -0.2852 0.9859 0.4448  
Cu1    -0.2247 0.6103 0.2985  
Cu1    0.2753 0.8897 0.7985  
Cu1    0.7753 0.6103 1.2985  
Ag1    0.7148 0.9859 1.4448  
Cu1    0.7247 0.8897 1.7015
```

Circuit No 15; Type=8i; Centroid: (0.250,0.750,0.000)

```
-----  
Atom   x   y   z  
-----  
Cu1    0.2247 0.6103 0.2015  
Cu1    -0.2753 0.8897 -0.2985  
Ag1    -0.2148 0.5141 -0.4448  
Cu1    -0.2247 0.6103 -0.7015  
Cu1    0.2753 0.8897 -0.2015  
Cu1    0.7753 0.6103 0.2985  
Ag1    0.7148 0.9859 0.4448  
Cu1    0.7247 0.8897 0.7015
```

Circuit No 16; Type=8j; Centroid: (0.250,0.750,0.000)

```
-----  
Atom   x   y   z  
-----  
Cu1    0.2247 0.6103 0.2015  
Cu1    -0.2753 0.8897 -0.2985  
Ag1    -0.2852 0.9859 -0.5552  
Cu1    -0.2247 0.6103 -0.7015  
Cu1    0.2753 0.8897 -0.2015  
Cu1    0.7753 0.6103 0.2985  
Ag1    0.7852 0.5141 0.5552  
Cu1    0.7247 0.8897 0.7015
```

Circuit No 17; Type=8k; Centroid: (0.439,0.425,0.532)

| Atom | x      | y      | z      |
|------|--------|--------|--------|
| Ag1  | 0.2148 | 0.4859 | 0.4448 |
| Cu1  | 0.2247 | 0.3897 | 0.7015 |
| Ag1  | 0.2852 | 0.0141 | 0.5552 |
| Cu1  | 0.2753 | 0.1103 | 0.2985 |
| Cu1  | 0.7753 | 0.3897 | 0.7985 |
| Ag1  | 0.7852 | 0.5141 | 0.5552 |
| Cu1  | 0.7247 | 0.8897 | 0.7015 |
| Cu1  | 0.2247 | 0.6103 | 0.2015 |

Circuit No 18; Type=8l; Centroid: (0.064,0.425,0.157)

| Atom | x       | y      | z       |
|------|---------|--------|---------|
| Ag1  | 0.2148  | 0.4859 | 0.4448  |
| Cu1  | 0.2247  | 0.3897 | 0.7015  |
| Ag1  | 0.2852  | 0.0141 | 0.5552  |
| Cu1  | 0.2753  | 0.1103 | 0.2985  |
| Cu1  | -0.2247 | 0.3897 | -0.2015 |
| Ag1  | -0.2148 | 0.5141 | -0.4448 |
| Cu1  | -0.2753 | 0.8897 | -0.2985 |
| Cu1  | 0.2247  | 0.6103 | 0.2015  |

Ring links

Cycle 1 | Cycle 2 | Chain | Cross | Link | Hopf | Mult

8g | 8g | 1 | 1 | 1 | \* | 2

## Topological Analysis output for 2.

#####  
228:Cu 14cyclohexdicarb 3pina  
#####

### Topology for Cu1

-----  
Common vertex with R(A-A)  
Cu 1 1.9395 0.3639 0.4101 ( 1 0 0) 10.350A 1  
Cu 1 -0.0605 0.3639 0.4101 (-1 0 0) 10.350A 1  
Au 1 1.5000 1.0000 0.0000 ( 1 1 0) 11.749A 1  
Au 1 0.5000 0.0000 1.0000 ( 0 0 1) 12.476A 1

### Topology for Au1

-----  
Atom Au1 links by bridge ligands and has  
Common vertex with R(A-A)  
Au 1 0.5000 1.0000 0.0000 ( 0 1 0) 10.834A 1  
Au 1 0.5000 -1.0000 0.0000 ( 0-1 0) 10.834A 1  
Cu 1 -0.0605 -0.6361 0.4101 (-1-1 0) 11.749A 1  
Cu 1 1.0605 0.6361 -0.4101 ( 2 1 0) 11.749A 1  
Cu 1 0.9395 0.3639 -0.5899 ( 0 0-1) 12.476A 1  
Cu 1 0.0605 -0.3639 0.5899 ( 1 0 1) 12.476A 1

### Structural group analysis

-----  
Structural group No 1  
-----

Structure consists of 3D framework with AuCu2

### Coordination sequences

-----  
Cu1: 1 2 3 4 5 6 7 8 9 10  
Num 4 15 42 84 138 204 282 372 474 588  
Cum 5 20 62 146 284 488 770 1142 1616 2204  
Rad 11.2(1.1) 17.9(5.8) 22.8(7.3) 29.1(8.9) 36.5(9.8) 44.2(10.8) 51.9(11.9) 59.6(13.1) 67.3(14.4)  
75.0(15.8)  
Cmp Cu2Au2 Cu7Au8 Cu24Au18 Cu52Au32 Cu88Au50 Cu132Au72 Cu184Au98 Cu244Au128  
Cu312Au162 Cu388Au200

-----  
Au1: 1 2 3 4 5 6 7 8 9 10  
Num 6 20 48 90 144 210 288 378 480 594  
Cum 7 27 75 165 309 519 807 1185 1665 2259  
Rad 11.7(0.7) 17.1(4.5) 23.2(7.0) 30.1(8.0) 37.6(9.1) 45.1(10.3) 52.8(11.6) 60.4(13.0) 68.1(14.4)  
75.7(15.8)  
Cmp Cu4Au2 Cu16Au4 Cu36Au12 Cu64Au26 Cu100Au44 Cu144Au66 Cu196Au92 Cu256Au122  
Cu324Au156 Cu400Au194

-----  
TD10=2222

### Vertex symbols for selected sublattice

-----  
Cu1 Point (Schlafli) symbol: {4.6^4.8}

Extended point symbol:[4.8(8).6(4).6(4).6(4).6(4)]

Au1 Point (Schlafli) symbol: {4^2.6^12.8}

Extended point symbol:[4.4.6(2).6(2).6(2).6(2).6(2).6(2).6(2).6(2).6(2).6(2).6(2).8(8)]

Point (Schlafli) symbol for net: {4.6^4.8}2{4^2.6^12.8}

4,6-c net with stoichiometry (4-c)2(6-c); 2-nodal net

New topology, please, contact the authors (23682 types in 6 databases)

Minimum circuits for independent edges (bonds)

| No | Atom | x       | y      | z      | Atom | x       | y      | z      | Dist.  | N |
|----|------|---------|--------|--------|------|---------|--------|--------|--------|---|
| 1  | Cu1  | 0.9395  | 0.3639 | 0.4101 | Cu1  | -0.0605 | 0.3639 | 0.4101 | 10.350 | 6 |
| 2  | Cu1  | -0.0605 | 0.3639 | 0.4101 | Au1  | 0.5000  | 1.0000 | 0.0000 | 11.749 | 4 |
| 3  | Cu1  | 0.9395  | 0.3639 | 0.4101 | Au1  | 0.5000  | 0.0000 | 1.0000 | 12.476 | 4 |
| 4  | Au1  | 0.5000  | 1.0000 | 0.0000 | Au1  | 0.5000  | 0.0000 | 0.0000 | 10.834 | 6 |

Non-equivalent circuits

Circuit No 1; Type=4; Centroid: (0.000,0.500,0.500)

| Atom | x       | y       | z       |
|------|---------|---------|---------|
| Cu1  | -0.0605 | 0.3639  | 0.4101  |
| Au1  | -0.5000 | -0.0000 | 1.0000  |
| Cu1  | 0.0605  | 0.6361  | 0.5899  |
| Au1  | 0.5000  | 1.0000  | -0.0000 |

Circuit No 2; Type=6a; Centroid: (0.500,0.500,0.500)

| Atom | x       | y      | z       |
|------|---------|--------|---------|
| Cu1  | -0.0605 | 0.3639 | 0.4101  |
| Cu1  | 0.9395  | 0.3639 | 0.4101  |
| Au1  | 0.5000  | 0.0000 | 1.0000  |
| Cu1  | 1.0605  | 0.6361 | 0.5899  |
| Cu1  | 0.0605  | 0.6361 | 0.5899  |
| Au1  | 0.5000  | 1.0000 | -0.0000 |

Circuit No 3; Type=6b; Centroid: (0.667,0.667,0.333)

| Atom | x       | y      | z       |
|------|---------|--------|---------|
| Cu1  | -0.0605 | 0.3639 | 0.4101  |
| Cu1  | 0.9395  | 0.3639 | 0.4101  |
| Au1  | 1.5000  | 1.0000 | 0.0000  |
| Cu1  | 1.0605  | 0.6361 | 0.5899  |
| Cu1  | 0.0605  | 0.6361 | 0.5899  |
| Au1  | 0.5000  | 1.0000 | -0.0000 |

Circuit No 4; Type=6c; Centroid: (0.960,0.909,0.940)

```
-----  
Atom   x   y   z  
-----  
Cu1  -0.0605  0.3639  1.4101  
Cu1   0.9395  0.3639  1.4101  
Au1   1.5000  1.0000  1.0000  
Cu1   1.9395  1.3639  0.4101  
Cu1   0.9395  1.3639  0.4101  
Au1   0.5000  1.0000  1.0000
```

Circuit No 5; Type=6d; Centroid: (0.000,0.000,0.000)

```
-----  
Atom   x   y   z  
-----  
Cu1  -1.0605 -0.6361  0.4101  
Cu1  -0.0605 -0.6361  0.4101  
Au1   0.5000  0.0000  0.0000  
Cu1   1.0605  0.6361 -0.4101  
Cu1   0.0605  0.6361 -0.4101  
Au1  -0.5000 -0.0000 -0.0000
```

Circuit No 6; Type=6e; Centroid: (0.000,0.000,0.000)

```
-----  
Atom   x   y   z  
-----  
Cu1  -0.0605  0.3639 -0.5899  
Cu1   0.9395  0.3639 -0.5899  
Au1   0.5000  0.0000  0.0000  
Cu1   0.0605 -0.3639  0.5899  
Cu1  -0.9395 -0.3639  0.5899  
Au1  -0.5000 -0.0000 -0.0000
```

Circuit No 7; Type=6f; Centroid: (0.500,0.500,0.500)

```
-----  
Atom   x   y   z  
-----  
Cu1  -0.0605  0.3639  0.4101  
Cu1   0.9395  0.3639  0.4101  
Au1   1.5000  1.0000  0.0000  
Cu1   1.0605  0.6361  0.5899  
Cu1   0.0605  0.6361  0.5899  
Au1  -0.5000 -0.0000  1.0000
```

Circuit No 8; Type=6g; Centroid: (0.000,0.000,0.500)

```
-----  
Atom   x   y   z  
-----  
Au1   0.5000  0.0000  0.0000  
Au1   0.5000  1.0000 -0.0000  
Cu1   0.0605  0.6361  0.5899  
Au1  -0.5000 -0.0000  1.0000  
Au1  -0.5000 -1.0000  1.0000  
Cu1  -0.0605 -0.6361  0.4101
```

Crossed with bonds

---

| No  | Atom | x       | y       | z      | Atom | x       | y       | z      | Dist.  | N Cycles            |
|-----|------|---------|---------|--------|------|---------|---------|--------|--------|---------------------|
| * 1 | Cu1  | -0.9395 | -0.3639 | 0.5899 | Cu1  | 0.0605  | -0.3639 | 0.5899 | 10.350 | 8a/1 8a/1 8b/1 8c/1 |
| * 1 | Cu1  | 0.9395  | 0.3639  | 0.4101 | Cu1  | -0.0605 | 0.3639  | 0.4101 | 10.350 | 8a/1 8a/1 8b/1 8c/1 |

---

Circuit No 9; Type=6h; Centroid: (0.980,0.955,0.470)

---

| Atom | x      | y      | z      |
|------|--------|--------|--------|
| Au1  | 1.5000 | 1.0000 | 0.0000 |
| Au1  | 1.5000 | 2.0000 | 0.0000 |
| Cu1  | 0.9395 | 1.3639 | 0.4101 |
| Au1  | 0.5000 | 1.0000 | 1.0000 |
| Au1  | 0.5000 | 0.0000 | 1.0000 |
| Cu1  | 0.9395 | 0.3639 | 0.4101 |

Crossed with bonds

---

| No  | Atom | x      | y      | z      | Atom | x      | y      | z      | Dist.  | N Cycles            |
|-----|------|--------|--------|--------|------|--------|--------|--------|--------|---------------------|
| * 1 | Cu1  | 0.0605 | 0.6361 | 0.5899 | Cu1  | 1.0605 | 0.6361 | 0.5899 | 10.350 | 8a/1 8a/1 8b/1 8c/1 |

---

Circuit No 10; Type=6i; Centroid: (0.000,0.000,0.500)

---

| Atom | x       | y       | z       |
|------|---------|---------|---------|
| Au1  | -0.5000 | -1.0000 | 1.0000  |
| Au1  | -0.5000 | -0.0000 | 1.0000  |
| Cu1  | -0.0605 | 0.3639  | 0.4101  |
| Au1  | 0.5000  | 1.0000  | -0.0000 |
| Au1  | 0.5000  | 0.0000  | 0.0000  |
| Cu1  | 0.0605  | -0.3639 | 0.5899  |

---

| Atom | x       | y      | z      |
|------|---------|--------|--------|
| Cu1  | -0.0605 | 0.3639 | 1.4101 |
| Cu1  | -1.0605 | 0.3639 | 1.4101 |
| Au1  | -0.5000 | 1.0000 | 1.0000 |
| Cu1  | -0.0605 | 1.3639 | 0.4101 |
| Cu1  | 0.9395  | 1.3639 | 0.4101 |
| Cu1  | 1.9395  | 1.3639 | 0.4101 |
| Au1  | 1.5000  | 1.0000 | 1.0000 |
| Cu1  | 0.9395  | 0.3639 | 1.4101 |

Crossed with bonds

---

| No  | Atom | x      | y      | z      | Atom | x      | y      | z      | Dist.  | N Cycles                                                                   |
|-----|------|--------|--------|--------|------|--------|--------|--------|--------|----------------------------------------------------------------------------|
| * 4 | Au1  | 0.5000 | 1.0000 | 1.0000 | Au1  | 0.5000 | 0.0000 | 1.0000 | 10.834 | 6g/1 6g/1 6h/1 6h/1 8g/1 8g/1 8g/1 8g/1 8g/1 8h/1 8h/1 8i/1 8i/1 8i/1 8i/1 |

---

Circuit No 12; Type=8b; Centroid: (0.500,0.000,0.000)

```
-----
Atom   x   y   z
-----
Cu1  -0.0605 -0.6361 0.4101
Cu1  -1.0605 -0.6361 0.4101
Au1  -0.5000 -0.0000 -0.0000
Cu1   0.0605 0.6361 -0.4101
Cu1   1.0605 0.6361 -0.4101
Cu1   2.0605 0.6361 -0.4101
Au1   1.5000 0.0000 0.0000
Cu1   0.9395 -0.6361 0.4101
```

Crossed with bonds

```
-----
No | Atom   x   y   z | Atom   x   y   z | Dist. | N Cycles
-----
* 3 | Cu1    0.0605 -0.3639 0.5899 | Au1    0.5000 0.0000 0.0000 | 12.476 | 6g/1 6h/1 6h/1 6i/1 8c/1
    | 8c/1 8g/1 8g/1 8h/1 8i/1
* 3 | Cu1    0.9395 0.3639 -0.5899 | Au1    0.5000 0.0000 0.0000 | 12.476 | 6g/1 6h/1 6h/1 6i/1 8c/1
    | 8c/1 8g/1 8g/1 8h/1 8i/1
* 4 | Au1    0.5000 0.0000 0.0000 | Au1    0.5000 -1.0000 0.0000 | 10.834 | 6g/1 6h/1 6h/1 6i/1 8g/1
    | 8g/1 8g/1 8g/1 8g/1 8g/1 8h/1 8h/1 8h/1 8i/1 8i/1 8i/1
* 4 | Au1    0.5000 1.0000 0.0000 | Au1    0.5000 0.0000 0.0000 | 10.834 | 6g/1 6h/1 6h/1 6i/1 8g/1
    | 8g/1 8g/1 8g/1 8g/1 8g/1 8h/1 8h/1 8h/1 8i/1 8i/1 8i/1
-----
```

Circuit No 13; Type=8c; Centroid: (0.500,0.000,0.000)

```
-----
Atom   x   y   z
-----
Cu1   0.9395 0.3639 -0.5899
Cu1  -0.0605 0.3639 -0.5899
Au1  -0.5000 -0.0000 -0.0000
Cu1  -0.9395 -0.3639 0.5899
Cu1   0.0605 -0.3639 0.5899
Cu1   1.0605 -0.3639 0.5899
Au1   1.5000 0.0000 0.0000
Cu1   1.9395 0.3639 -0.5899
```

Crossed with bonds

```
-----
No | Atom   x   y   z | Atom   x   y   z | Dist. | N Cycles
-----
* 2 | Cu1    1.0605 0.6361 -0.4101 | Au1    0.5000 0.0000 0.0000 | 11.749 | 6g/1 6h/1 6h/1 6i/1 8b/1
    | 8b/1 8g/1 8g/1 8h/1 8i/1
* 2 | Cu1   -0.0605 -0.6361 0.4101 | Au1    0.5000 0.0000 0.0000 | 11.749 | 6g/1 6h/1 6h/1 6i/1 8b/1
    | 8b/1 8g/1 8g/1 8h/1 8i/1
* 4 | Au1    0.5000 0.0000 0.0000 | Au1    0.5000 -1.0000 0.0000 | 10.834 | 6g/1 6h/1 6h/1 6i/1 8g/1
    | 8g/1 8g/1 8g/1 8g/1 8g/1 8h/1 8h/1 8h/1 8i/1 8i/1 8i/1
* 4 | Au1    0.5000 1.0000 0.0000 | Au1    0.5000 0.0000 0.0000 | 10.834 | 6g/1 6h/1 6h/1 6i/1 8g/1
    | 8g/1 8g/1 8g/1 8g/1 8g/1 8h/1 8h/1 8h/1 8i/1 8i/1 8i/1
-----
```

Circuit No 14; Type=8d; Centroid: (0.875,0.375,0.625)

```
-----
Atom   x   y   z
```

```
-----  
Cu1  0.9395 0.3639 0.4101  
Cu1  -0.0605 0.3639 0.4101  
Au1  -0.5000 -0.0000 1.0000  
Cu1  0.0605 0.6361 0.5899  
Cu1  1.0605 0.6361 0.5899  
Cu1  2.0605 0.6361 0.5899  
Au1  1.5000 0.0000 1.0000  
Cu1  1.9395 0.3639 0.4101
```

Circuit No 15; Type=8e; Centroid: (0.000,0.500,0.500)

```
-----  
Atom   x   y   z  
-----  
Cu1  -0.0605 0.3639 0.4101  
Cu1  -1.0605 0.3639 0.4101  
Au1  -0.5000 1.0000 -0.0000  
Cu1  -0.9395 0.6361 0.5899  
Cu1   0.0605 0.6361 0.5899  
Cu1   1.0605 0.6361 0.5899  
Au1   0.5000 0.0000 1.0000  
Cu1   0.9395 0.3639 0.4101
```

Circuit No 16; Type=8f; Centroid: (0.000,0.500,0.500)

```
-----  
Atom   x   y   z  
-----  
Cu1  -0.0605 0.3639 0.4101  
Cu1  -1.0605 0.3639 0.4101  
Au1  -1.5000 -0.0000 1.0000  
Cu1  -0.9395 0.6361 0.5899  
Cu1   0.0605 0.6361 0.5899  
Cu1   1.0605 0.6361 0.5899  
Au1   1.5000 1.0000 0.0000  
Cu1   0.9395 0.3639 0.4101
```

Circuit No 17; Type=8g; Centroid: (0.985,0.466,0.478)

```
-----  
Atom   x   y   z  
-----  
Au1   0.5000 0.0000 1.0000  
Au1   0.5000 -1.0000 1.0000  
Cu1   0.9395 -0.6361 0.4101  
Au1   1.5000 0.0000 0.0000  
Au1   1.5000 1.0000 0.0000  
Au1   1.5000 2.0000 0.0000  
Cu1   0.9395 1.3639 0.4101  
Au1   0.5000 1.0000 1.0000
```

Crossed with bonds

```
-----  
No | Atom   x   y   z | Atom   x   y   z | Dist. | N Cycles  
-----  
* 1 | Cu1   0.0605 -0.3639 0.5899 | Cu1   1.0605 -0.3639 0.5899 | 10.350 | 8a/1 8a/1 8b/1 8c/1  
* 1 | Cu1   0.0605 0.6361 0.5899 | Cu1   1.0605 0.6361 0.5899 | 10.350 | 8a/1 8a/1 8b/1 8c/1 8d/1  
8d/1 8e/1 8f/1
```



\* 1 | Cu1 1.9395 0.3639 0.4101 | Cu1 0.9395 0.3639 0.4101 | 10.350 | 8a/1 8a/1 8b/1 8c/1 8d/1  
8d/1 8e/1 8f/1

---

Circuit No 18; Type=8h; Centroid: (0.000,0.500,0.500)

---

| Atom | x       | y       | z       |
|------|---------|---------|---------|
| Au1  | -0.5000 | -0.0000 | 1.0000  |
| Au1  | -0.5000 | -1.0000 | 1.0000  |
| Cu1  | 0.0605  | -0.3639 | 0.5899  |
| Au1  | 0.5000  | 0.0000  | 0.0000  |
| Au1  | 0.5000  | 1.0000  | -0.0000 |
| Au1  | 0.5000  | 2.0000  | 0.0000  |
| Cu1  | -0.0605 | 1.3639  | 0.4101  |
| Au1  | -0.5000 | 1.0000  | 1.0000  |

Crossed with bonds

---

| No  | Atom | x       | y      | z      | Atom | x       | y      | z      | Dist.  | N Cycles                                   |
|-----|------|---------|--------|--------|------|---------|--------|--------|--------|--------------------------------------------|
| * 1 | Cu1  | -0.9395 | 0.6361 | 0.5899 | Cu1  | 0.0605  | 0.6361 | 0.5899 | 10.350 | 8a/1 8a/1 8b/1 8c/1 8d/1<br>8d/1 8e/1 8f/1 |
| * 1 | Cu1  | 0.9395  | 0.3639 | 0.4101 | Cu1  | -0.0605 | 0.3639 | 0.4101 | 10.350 | 8a/1 8a/1 8b/1 8c/1 8d/1<br>8d/1 8e/1 8f/1 |

---

Circuit No 19; Type=8i; Centroid: (0.000,0.500,0.500)

---

| Atom | x       | y       | z       |
|------|---------|---------|---------|
| Au1  | -0.5000 | -0.0000 | 1.0000  |
| Au1  | -0.5000 | -1.0000 | 1.0000  |
| Cu1  | -0.0605 | -0.6361 | 0.4101  |
| Au1  | 0.5000  | 0.0000  | 0.0000  |
| Au1  | 0.5000  | 1.0000  | -0.0000 |
| Au1  | 0.5000  | 2.0000  | 0.0000  |
| Cu1  | 0.0605  | 1.6361  | 0.5899  |
| Au1  | -0.5000 | 1.0000  | 1.0000  |

Crossed with bonds

---

| No  | Atom | x       | y       | z      | Atom | x       | y       | z      | Dist.  | N Cycles                                   |
|-----|------|---------|---------|--------|------|---------|---------|--------|--------|--------------------------------------------|
| * 1 | Cu1  | -0.9395 | -0.3639 | 0.5899 | Cu1  | 0.0605  | -0.3639 | 0.5899 | 10.350 | 8a/1 8a/1 8b/1 8c/1                        |
| * 1 | Cu1  | -0.9395 | 0.6361  | 0.5899 | Cu1  | 0.0605  | 0.6361  | 0.5899 | 10.350 | 8a/1 8a/1 8b/1 8c/1 8d/1<br>8d/1 8e/1 8f/1 |
| * 1 | Cu1  | 0.9395  | 0.3639  | 0.4101 | Cu1  | -0.0605 | 0.3639  | 0.4101 | 10.350 | 8a/1 8a/1 8b/1 8c/1 8d/1<br>8d/1 8e/1 8f/1 |
| * 1 | Cu1  | 0.9395  | 1.3639  | 0.4101 | Cu1  | -0.0605 | 1.3639  | 0.4101 | 10.350 | 8a/1 8a/1 8b/1 8c/1                        |

---

Ring links

---

Cycle 1 | Cycle 2 | Chain | Cross | Link | Hopf | Mult

---

|    |    |   |   |   |   |   |
|----|----|---|---|---|---|---|
| 6g | 8a | 1 | 1 | 1 | * | 4 |
| 6g | 8b | 1 | 1 | 1 | * | 2 |

|    |    |   |   |   |   |   |
|----|----|---|---|---|---|---|
| 6g | 8c | 1 | 1 | 1 | * | 2 |
| 6h | 8a | 1 | 1 | 1 | * | 2 |
| 6h | 8b | 1 | 1 | 1 | * | 1 |
| 6h | 8c | 1 | 1 | 1 | * | 1 |
| 8a | 6g | 1 | 1 | 1 | * | 2 |
| 8a | 6h | 1 | 1 | 1 | * | 2 |
| 8a | 8g | 1 | 1 | 1 | * | 6 |
| 8a | 8h | 1 | 1 | 1 | * | 2 |
| 8a | 8i | 1 | 1 | 1 | * | 4 |
| 8b | 6g | 1 | 1 | 1 | * | 2 |
| 8b | 6h | 1 | 1 | 1 | * | 2 |
| 8b | 8c | 1 | 1 | 1 | * | 2 |
| 8b | 8g | 1 | 1 | 1 | * | 6 |
| 8b | 8h | 1 | 1 | 1 | * | 2 |
| 8b | 8i | 1 | 1 | 1 | * | 4 |
| 8c | 6g | 1 | 1 | 1 | * | 2 |
| 8c | 6h | 1 | 1 | 1 | * | 2 |
| 8c | 8b | 1 | 1 | 1 | * | 2 |
| 8c | 8g | 1 | 1 | 1 | * | 6 |
| 8c | 8h | 1 | 1 | 1 | * | 2 |
| 8c | 8i | 1 | 1 | 1 | * | 4 |
| 8g | 8a | 1 | 1 | 1 | * | 6 |
| 8g | 8b | 1 | 1 | 1 | * | 3 |
| 8g | 8c | 1 | 1 | 1 | * | 3 |
| 8g | 8d | 1 | 2 | 0 |   | 2 |
| 8g | 8e | 1 | 2 | 0 |   | 1 |
| 8g | 8f | 1 | 2 | 0 |   | 1 |
| 8h | 8a | 1 | 1 | 1 | * | 4 |
| 8h | 8b | 1 | 1 | 1 | * | 2 |
| 8h | 8c | 1 | 1 | 1 | * | 2 |
| 8h | 8d | 1 | 2 | 0 |   | 2 |
| 8h | 8e | 1 | 2 | 0 |   | 1 |
| 8h | 8f | 1 | 2 | 0 |   | 1 |
| 8i | 8a | 1 | 1 | 1 | * | 8 |
| 8i | 8b | 1 | 1 | 1 | * | 4 |
| 8i | 8c | 1 | 1 | 1 | * | 4 |
| 8i | 8d | 1 | 2 | 0 |   | 2 |
| 8i | 8e | 1 | 2 | 0 |   | 1 |
| 8i | 8f | 1 | 2 | 0 |   | 1 |

---
